# Supplementary material
Source: PubMed Central journal article supplement (PMC2818899)
Supplement: 0903186107_pnas.0903186107_SI.pdf [file 0903186107_pnas.0903186107_SI.pdf]

# Supporting Information

Sugiyama et al. 10.1073/pnas.0903186107

SI Text

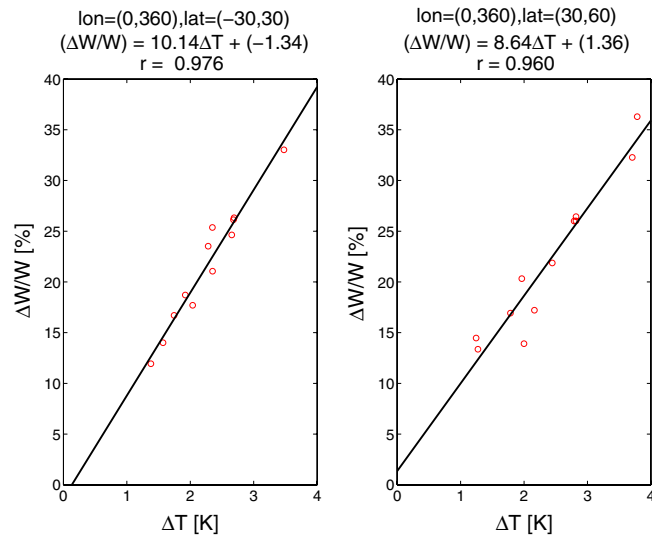

**Fig. S1.** Scatter plots of the fractional change in climatological-mean precipitable water and the change in temperature for (*Left*) the tropics and (*Right*) the midlatitudes for MIROC and the CMIP3 models. Shown at the top of each panel is the result of a least-squares fit. Precipitable water increases differ from the oft-quoted number of 7%/K in most cases, which is more representative of the lower troposphere than the entire troposphere.



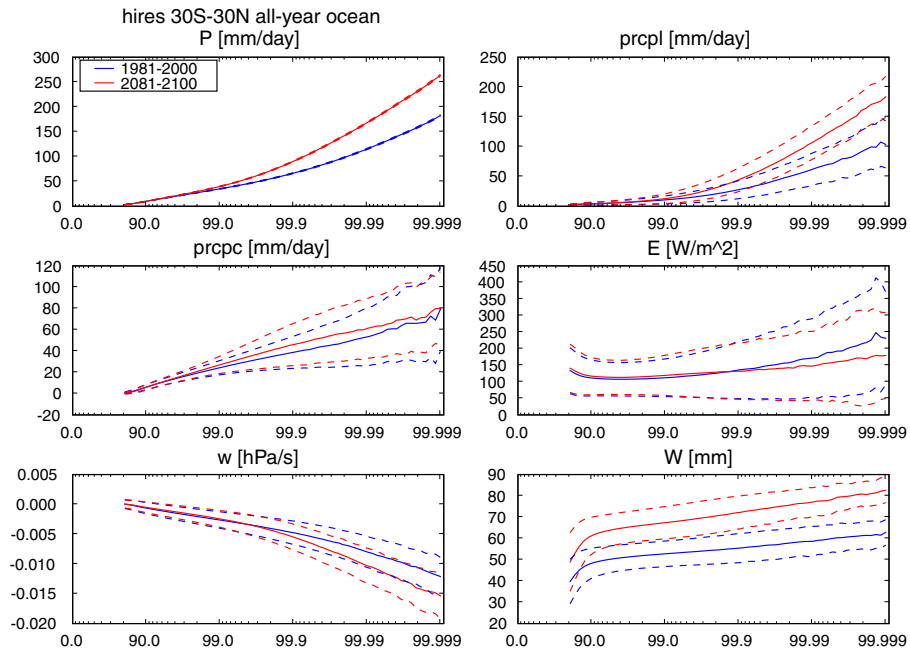

**Fig. S4.** Mean values and standard deviations of the variables conditioned on precipitation extremes in MIROC, which correspond to the results shown in Fig. 3. Plotted are: precipitation  $P$ , large-scale precipitation  $prcpl$ , convective precipitation  $prpc$ , evaporation  $E$ , the pressure velocity at the 500 hPa level  $w$ , and precipitable water  $W$ . The solid lines denote the mean values and the dashed lines represent a one-standard-deviation range. The standard deviation of precipitation  $P$  is barely visible because of the relatively small bin size used. Although the errors are large, the increases for extreme events are as large as, or larger than, one standard deviation for large-scale precipitation, precipitable water, and the mid-level vertical motion.

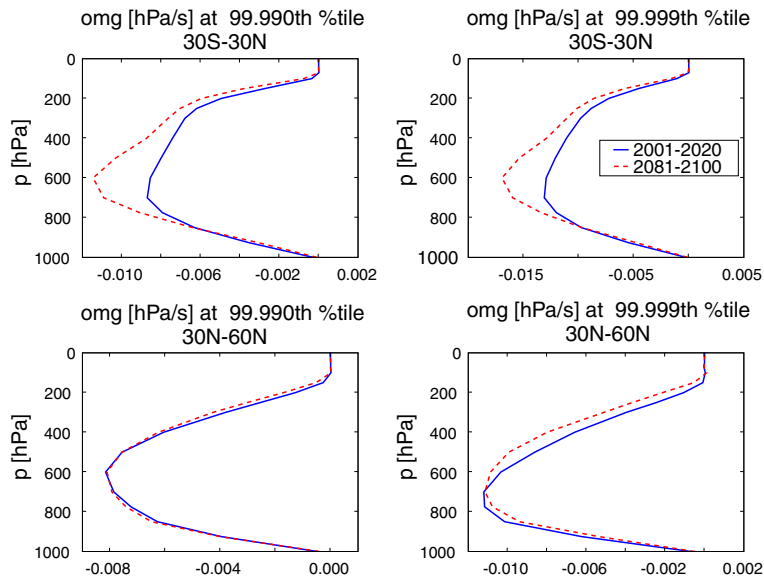

**Fig. S5.** Mean vertical motion conditioned on precipitation extremes in MIROC. The upper two panels represent 30°S–60°N, all seasons, whereas the lower panels 30°N–60°N, December–January–February. The text above each panel describes the percentile of precipitation distribution for which the composite has been constructed. The profile of vertical motion shifts upward under global warming.
